# Supplementary material for: The Specific Encapsulation of Procyanidins from Litchi Peel and Coffee Pulp Extracts via Spray-Drying Using Green Polymers
Source: MDPI journal article supplement (doi:10.3390/polym15183823), 2023-09-19
Supplement: s1 [file s1]

# The Specific Encapsulation of Procyanidins from Litchi Peel and Coffee Pulp Extracts by Spray-Drying using Green Polymers

María de los Ángeles Vázquez-Núñez <sup>1,†</sup>, Mayra Aguilar-Zárate <sup>2,†</sup>, Ricardo Gómez-García <sup>3</sup>, Carlos Reyes-Luna <sup>4</sup>, Pedro Aguilar-Zárate <sup>4,\*</sup> and Mariela R. Michel <sup>4,\*</sup>

<sup>1</sup> Facultad de Estudios Profesionales Zona Huasteca, Universidad Autónoma de San Luis Potosí, Romualdo del Campo 501, Colonia Rafael Curiel, Ciudad Valles, San Luis Potosí, C. P. 79060, México

<sup>2</sup> Facultad de Ciencias Químicas-CIEP, Universidad Autónoma de San Luis Potosí, Av. Dr. Manuel Nava 6, Zona Universitaria, 78210 San Luis Potosí, México

<sup>3</sup> Universidade Católica Portuguesa, CBQF - Centro de Biotecnologia e Química Fina – Laboratório Associado, Escola Superior de Biotecnologia, Rua Diogo Botelho 1327, 4169-005 Porto, Portugal

<sup>4</sup> Engineering Department, Tecnológico, Nacional de México/I. T. de Ciudad Valles, Carretera al Ingenio Plan de Ayala Km 2, Colonia Vista Hermosa, 79019, Ciudad Valles, San Luis Potosí, México

\* Correspondence: pedro.aguilar@tecvalles.mx (P.A.-Z.); mariela.michel@tecvalles.mx (M.R.M.)

† These authors contributed equally to this work.

## 1. Supplementary Material

**Table S1.** Procyanidin concentration in litchi and coffee samples.

| Sample | PCs in Extract (mg/L) | mg of PCs/g dry Matter | Content (% w/w) |
|--------|-----------------------|------------------------|-----------------|
| Litchi | 1213.48 ± 11.4        | 12.13 ± 0.11           | 1.21            |
| Coffee | 665.68 ± 8.5          | 6.66 ± 0.08            | 0.66            |

PCs = Procyanidins.

**Table S2.** Predicted and experimental values of the percentage of EE for litchi and coffee extracts.

|        | Predicted Value | Experimental Value | Bias * |
|--------|-----------------|--------------------|--------|
| Litchi | 103.20          | 98.1 ± 0.2         | 5.19   |
| Coffee | 94.22           | 93.6 ± 3.5         | 0.66   |

\* Bias (%) = (predicted value – experimental value) / experimental value \* 100
